# Supplementary material for: Genome-wide identification and expression analyses of C2H2 zinc finger transcription factors in Pleurotus ostreatus
Source: PeerJ. 2022 Jan 5;10:e12654. doi: 10.7717/peerj.12654 (PMC8742544; doi:10.7717/peerj.12654)
Supplement: Supplemental Information 2 [file peerj-10-12654-s002.xlsx]

## Sheet: Sheet1
	Table S1 Characteristics of C2H2-ZFPs in P. ostreatus
	Gene ID	Protein length	MW(kDa)	pI	Subcellular localization
	PleosPC15_2|1077016	446	50.681	8.74	Nucelar
	PleosPC15_2|1091415	611	66.006	5.69	Nucelar
	PleosPC15_2|157229	372	41.074	7.65	Nucelar
	PleosPC15_2|1051309	293	32.918	7.19	Nucelar
	PleosPC15_2|1046937	165	18.177	9.73	Nucelar
	PleosPC15_2|1089905	149	16.4	10.8	Nucelar
	PleosPC15_2|1102653	386	41.354	9.58	Nucelar
	PleosPC15_2|1079678	619	66.052	4.66	Nucelar
	PleosPC15_2|1053338	205	22.512	6.35	Nucelar
	PleosPC15_2|1104202	216	23.859	8.4	Nucelar
	PleosPC15_2|1088285	269	29.23	9.65	Nucelar
	PleosPC15_2|1102393	350	38.49	8.87	Nucelar
	PleosPC15_2|1111338	336	36.908	6.45	Nucelar
	PleosPC15_2|1107157	247	27.876	6.53	Nucelar
	PleosPC15_2|1054163	688	74.899	8.91	Nucelar
	PleosPC15_2|1095325	268	28.559	8.67	Nucelar
	PleosPC15_2|160383	169	18.166	8.85	Nucelar
	PleosPC15_2|1095114	339	37.659	5.86	Nucelar
